# Supplementary material for: A stereoselective approach for the southeast segment (C1–C16) of (+)-sorangicin A
Source: Royal Society of Chemistry journal article supplement (doi:10.1039/c3ob40985f), 2013-01-01
Supplement: c3ob40985f.pdf [file c3ob40985f.pdf]

# **A stereoselective approach for the southeast segment (C1–C16) of (+)-sorangicin A**

**Y. Sridhar and P. Srihari\***

## **Supporting Information**

**<sup>1</sup>H NMR and <sup>13</sup>C NMR spectra**

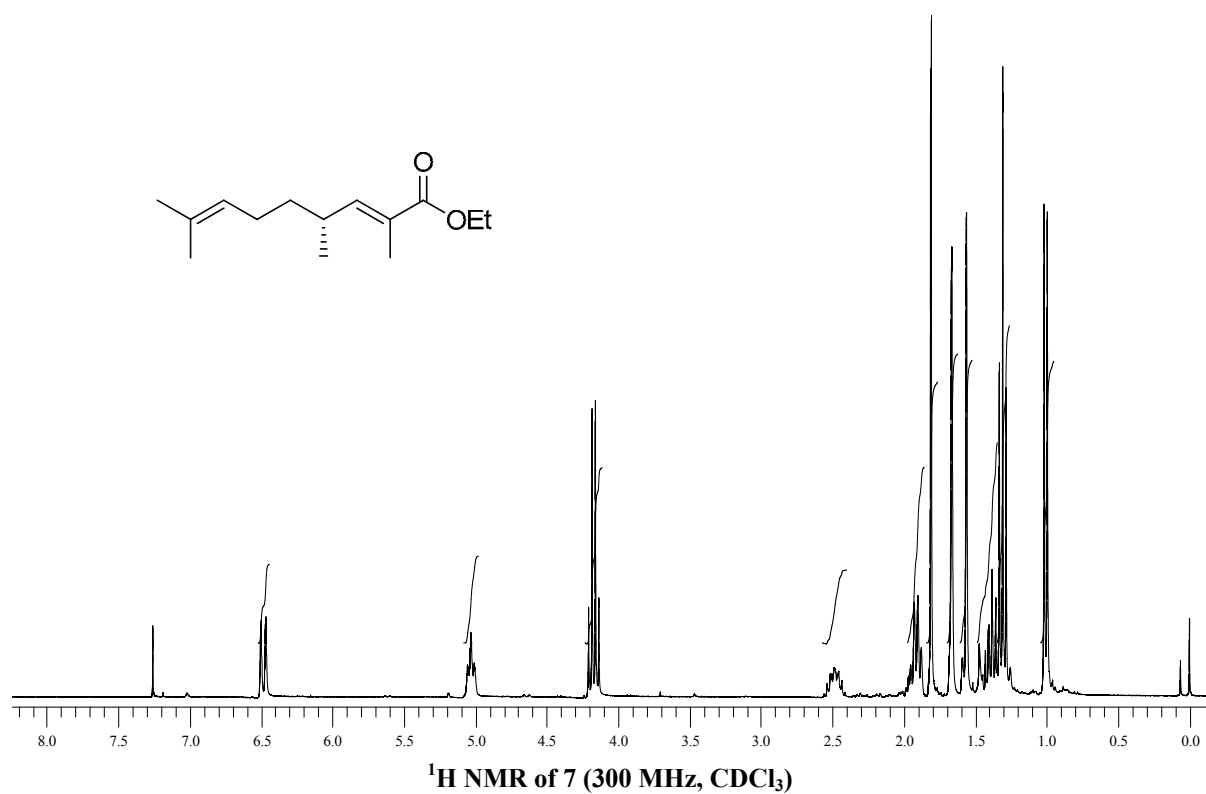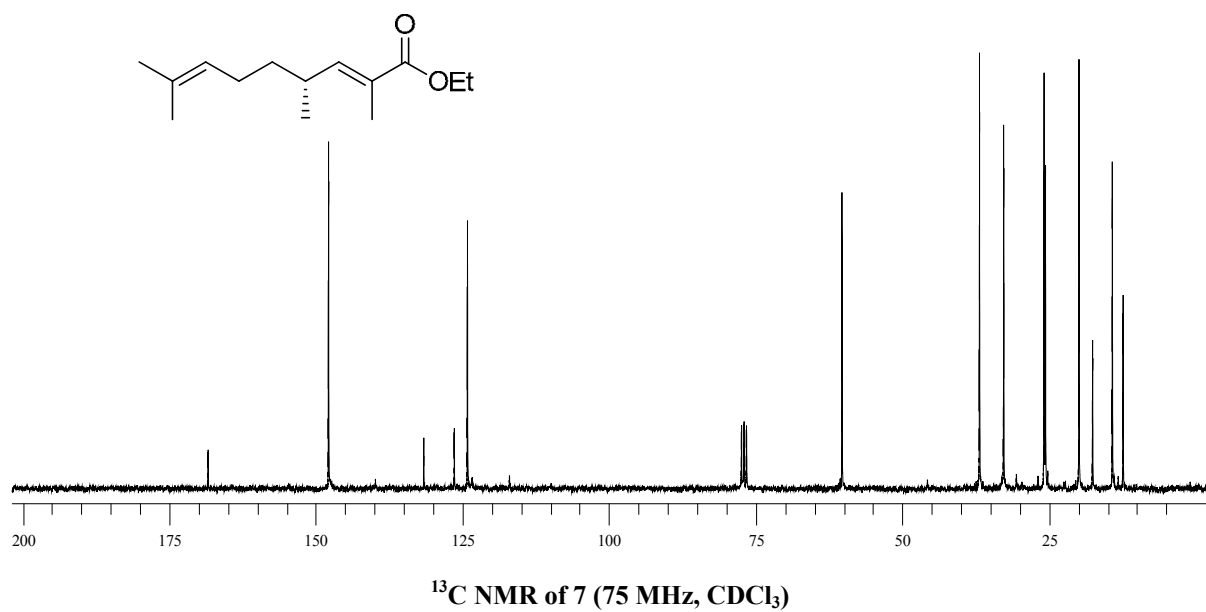

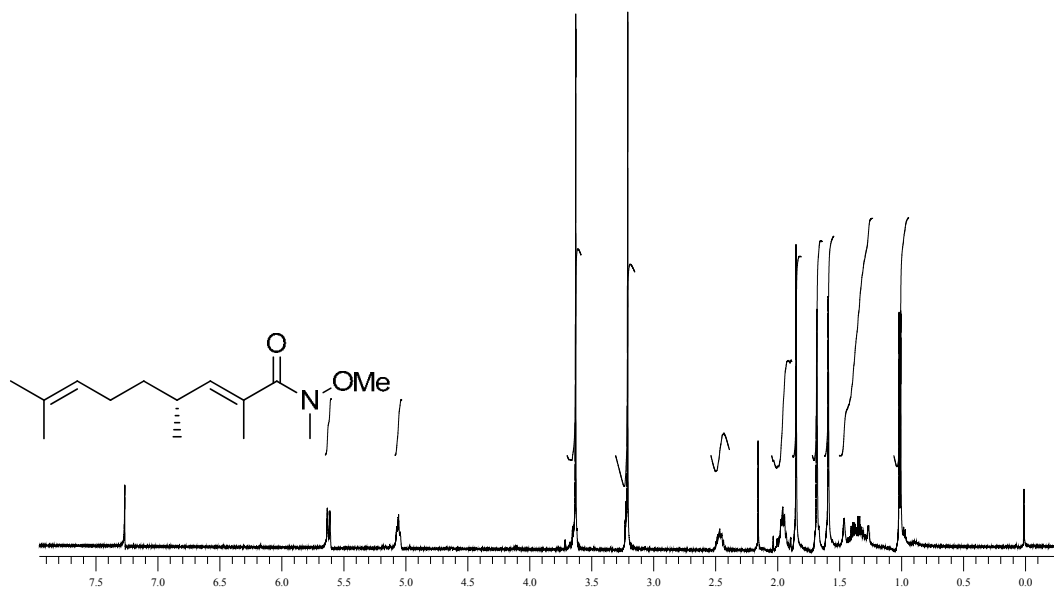

<sup>1</sup>H NMR of 9 (500 MHz, CDCl<sub>3</sub>)

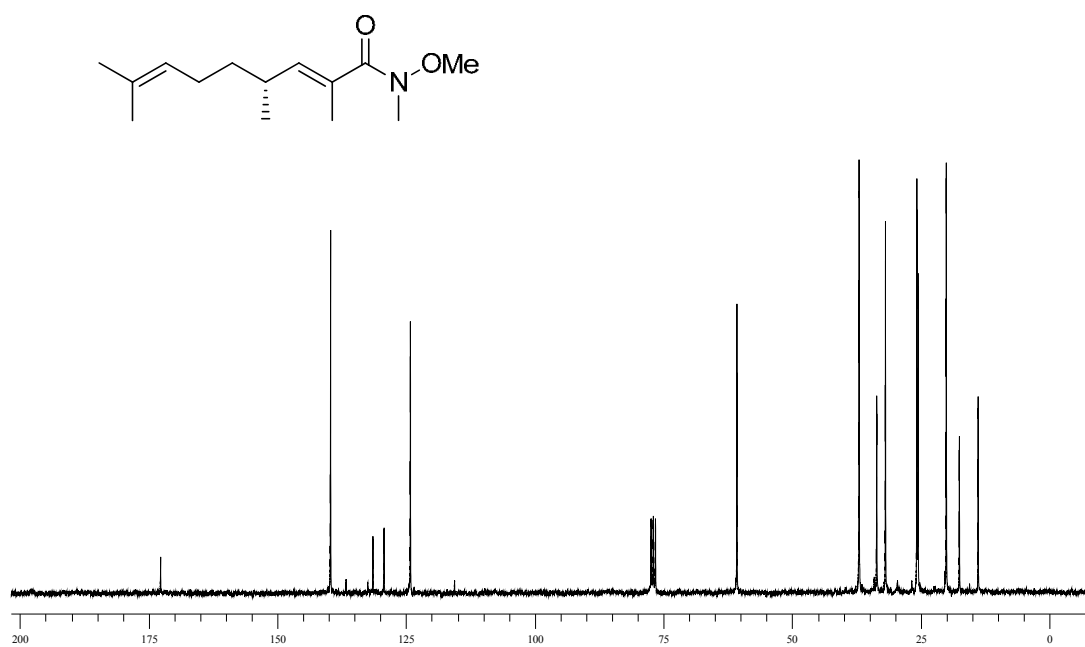

<sup>13</sup>C NMR of 9 (75 MHz, CDCl<sub>3</sub>)

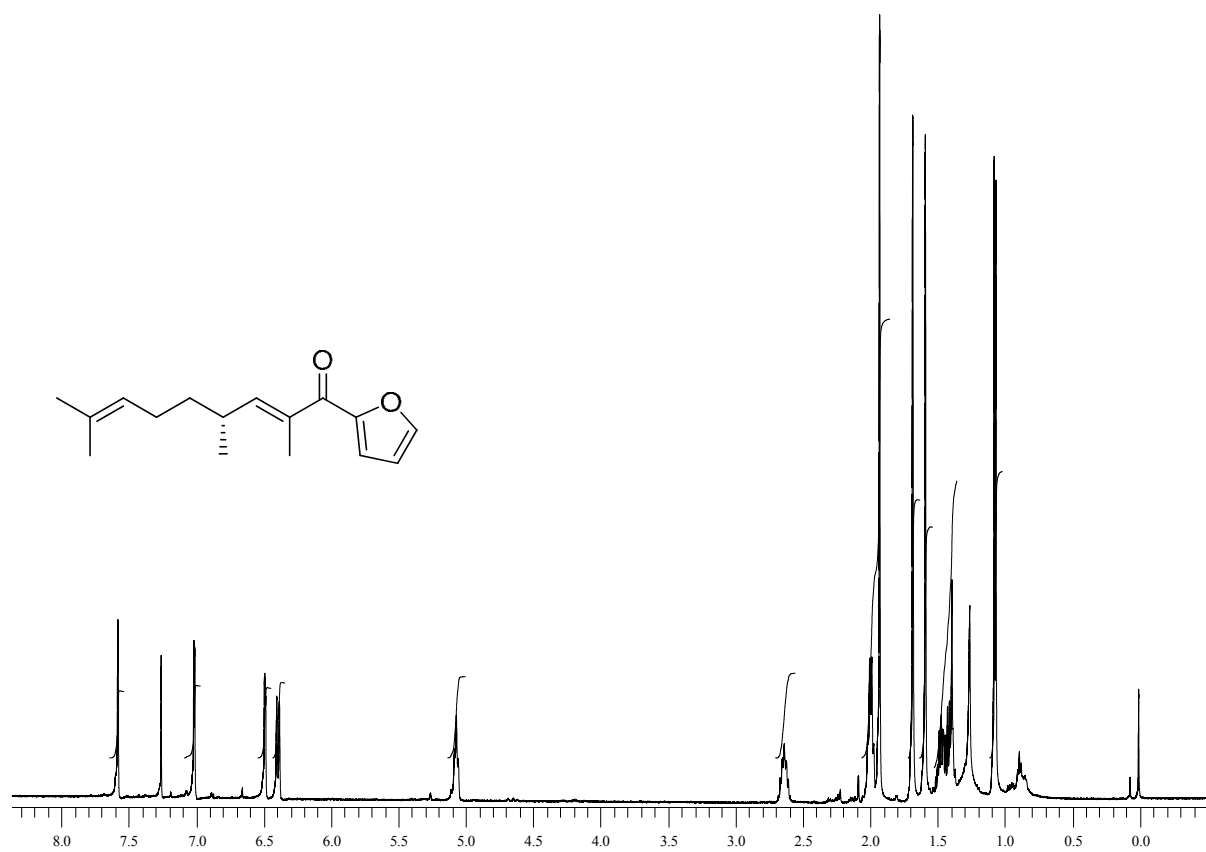

**<sup>1</sup>H NMR of 10 (500 MHz, CDCl<sub>3</sub>)**

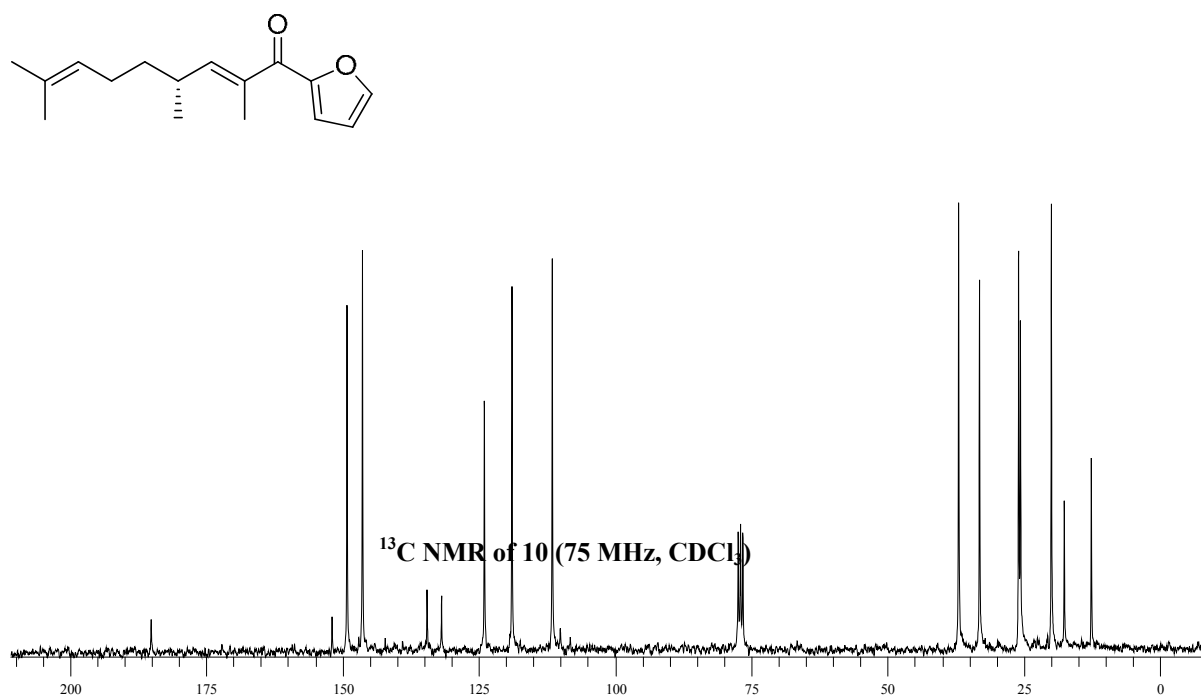

**<sup>13</sup>C NMR of 10 (75 MHz, CDCl<sub>3</sub>)**

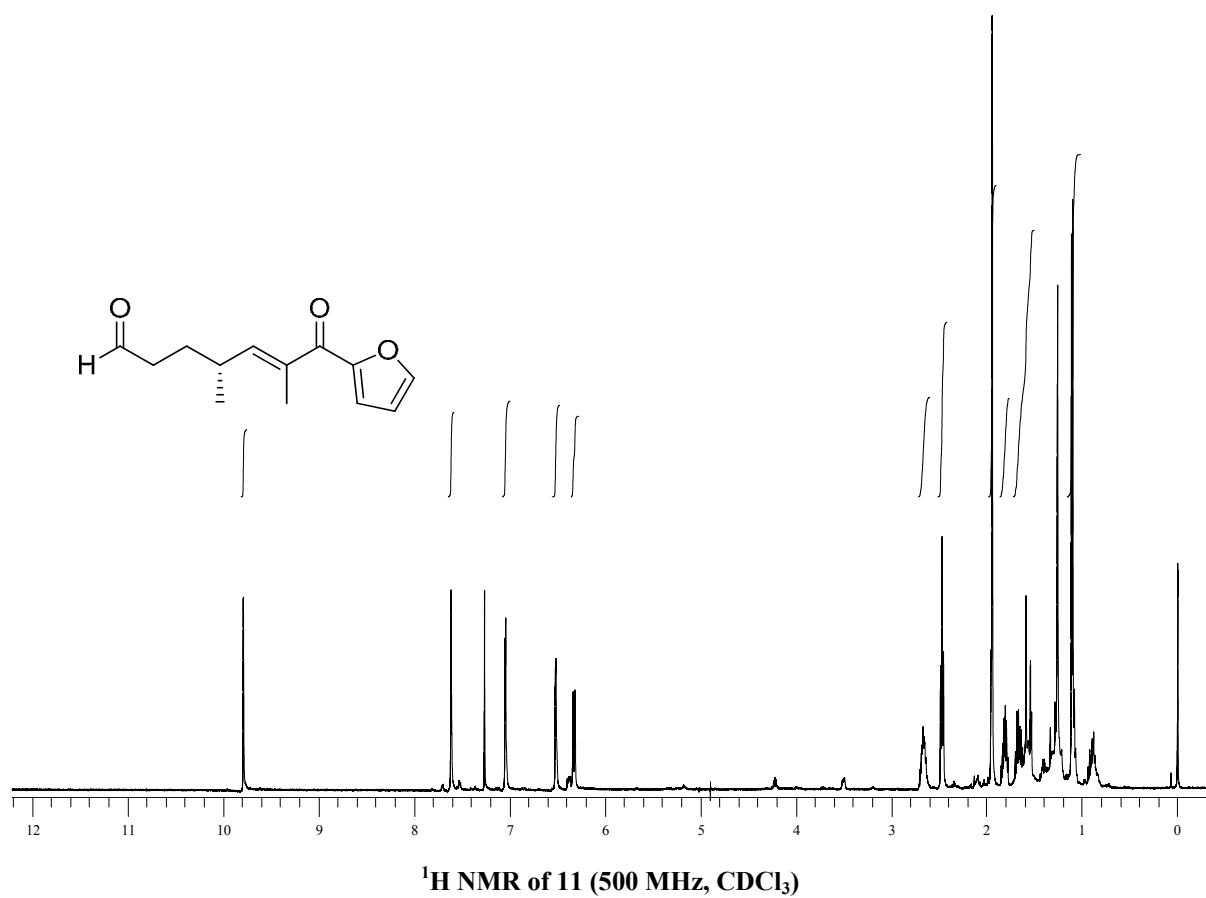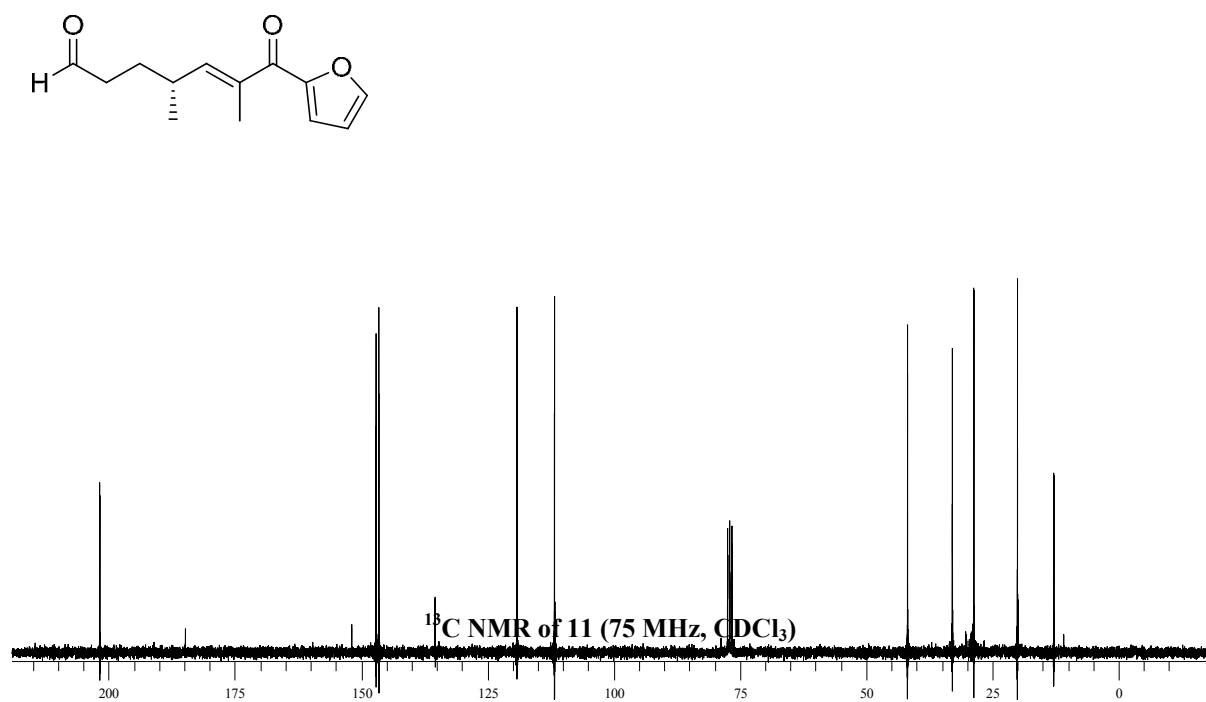

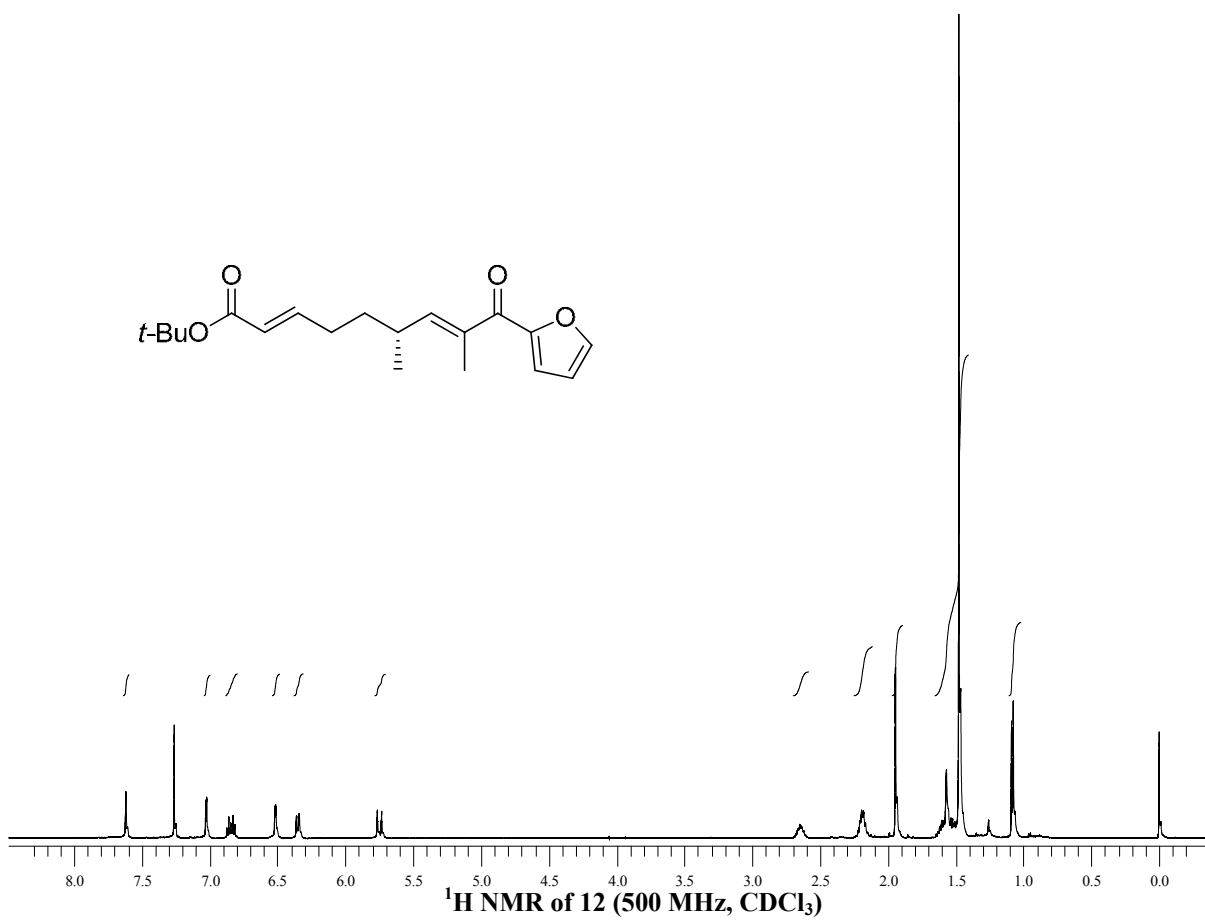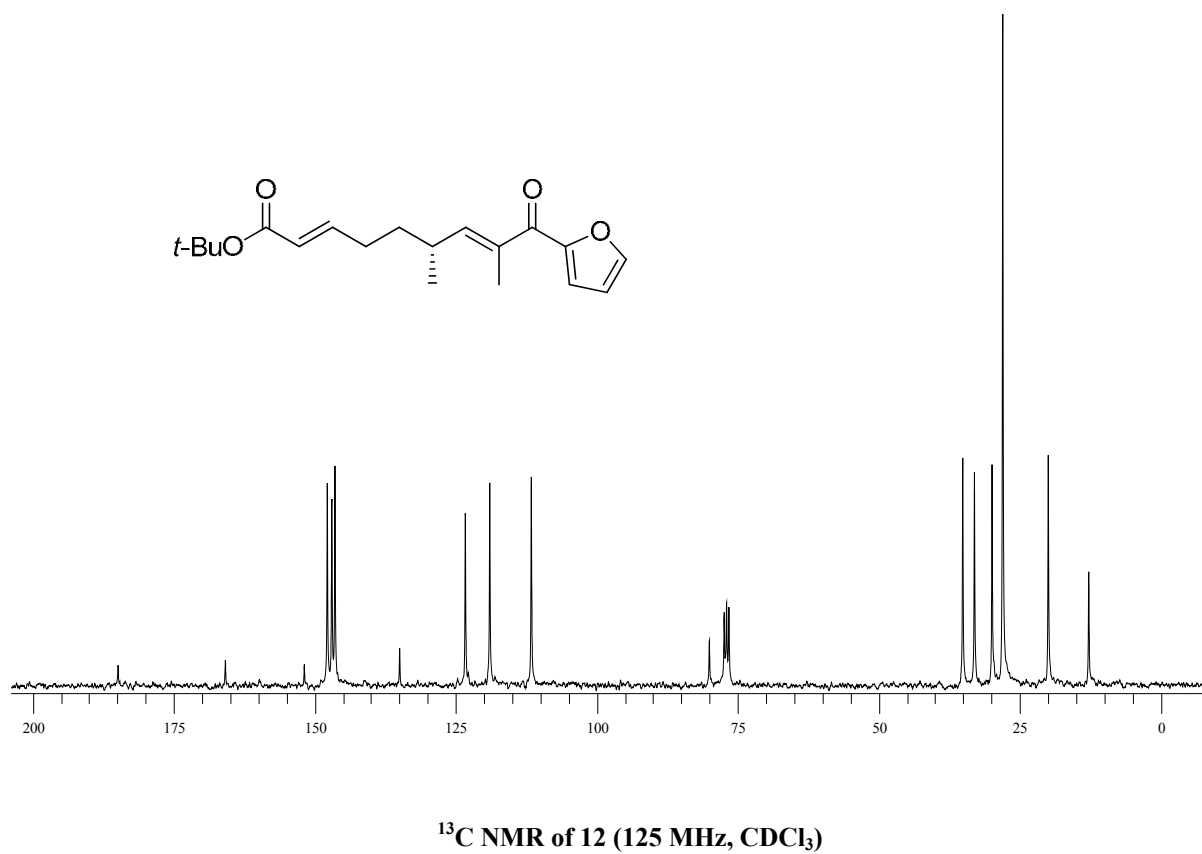

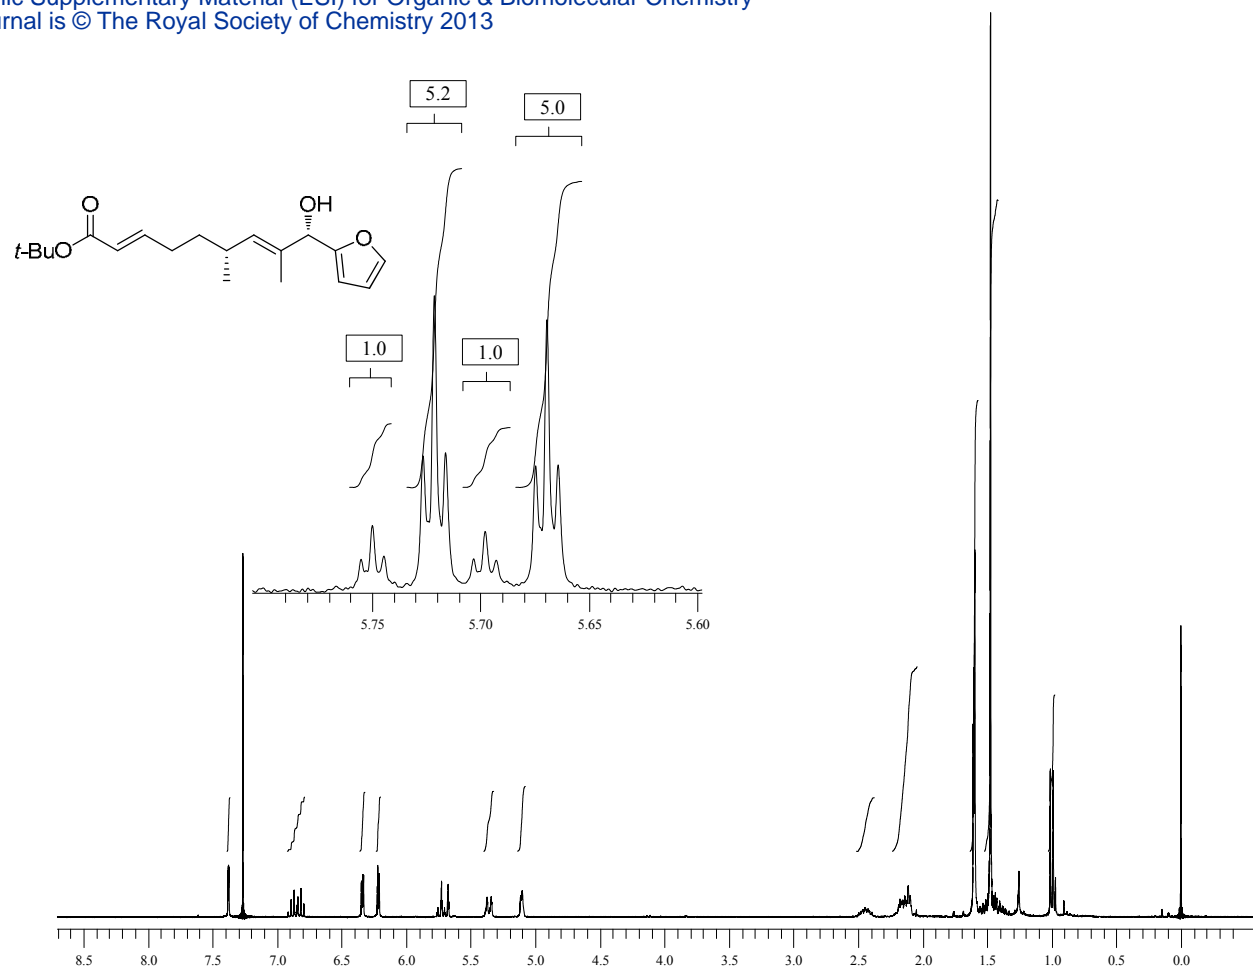

$^1\text{H}$  NMR of 6/6a (300 MHz,  $\text{CDCl}_3$ )

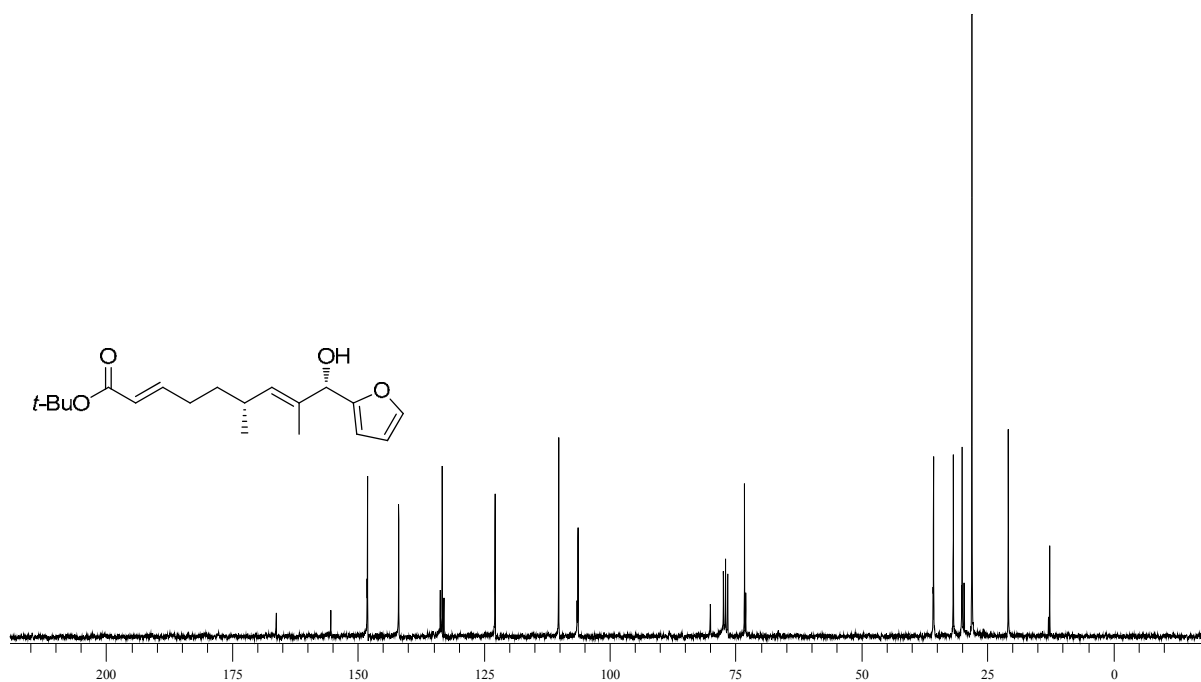

$^{13}\text{C}$  NMR of 6/6a (125 MHz,  $\text{CDCl}_3$ )

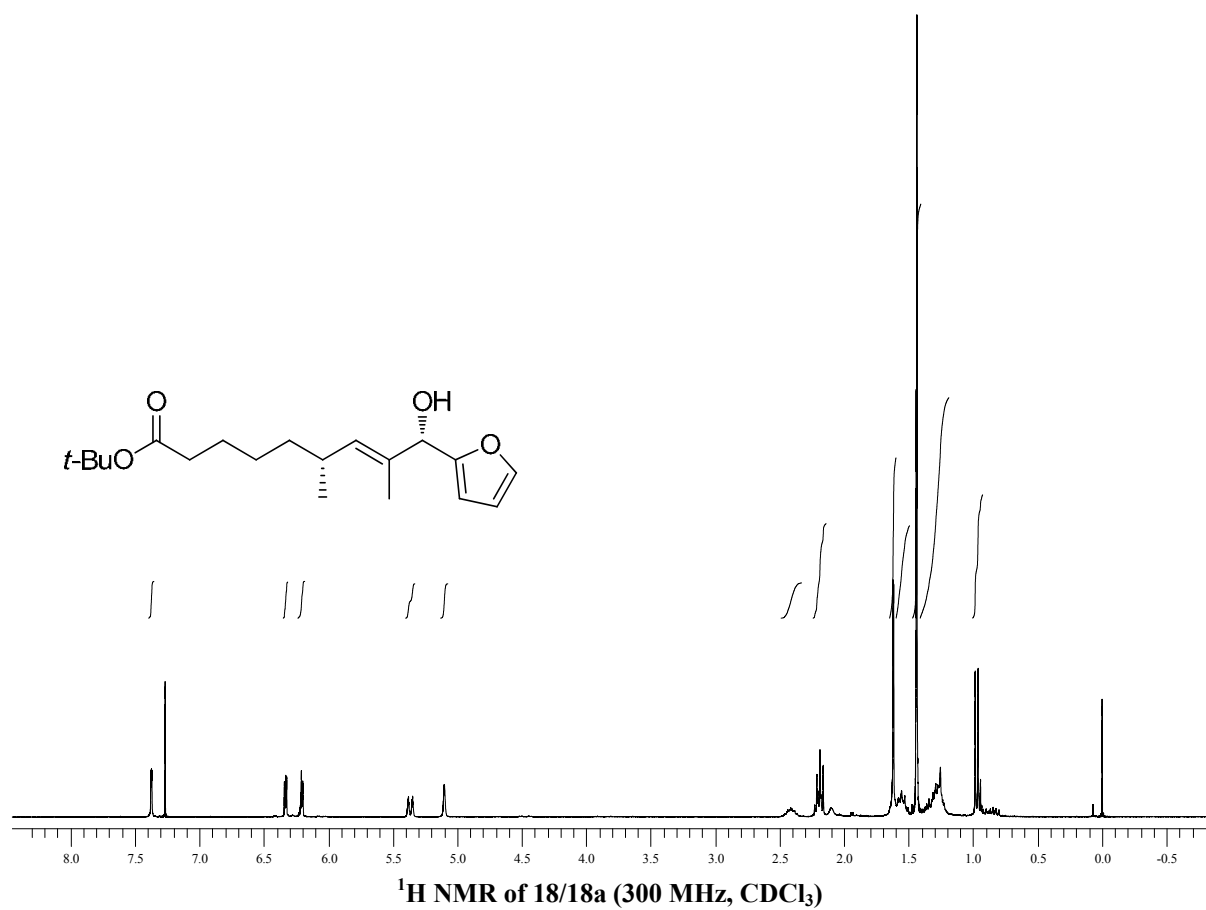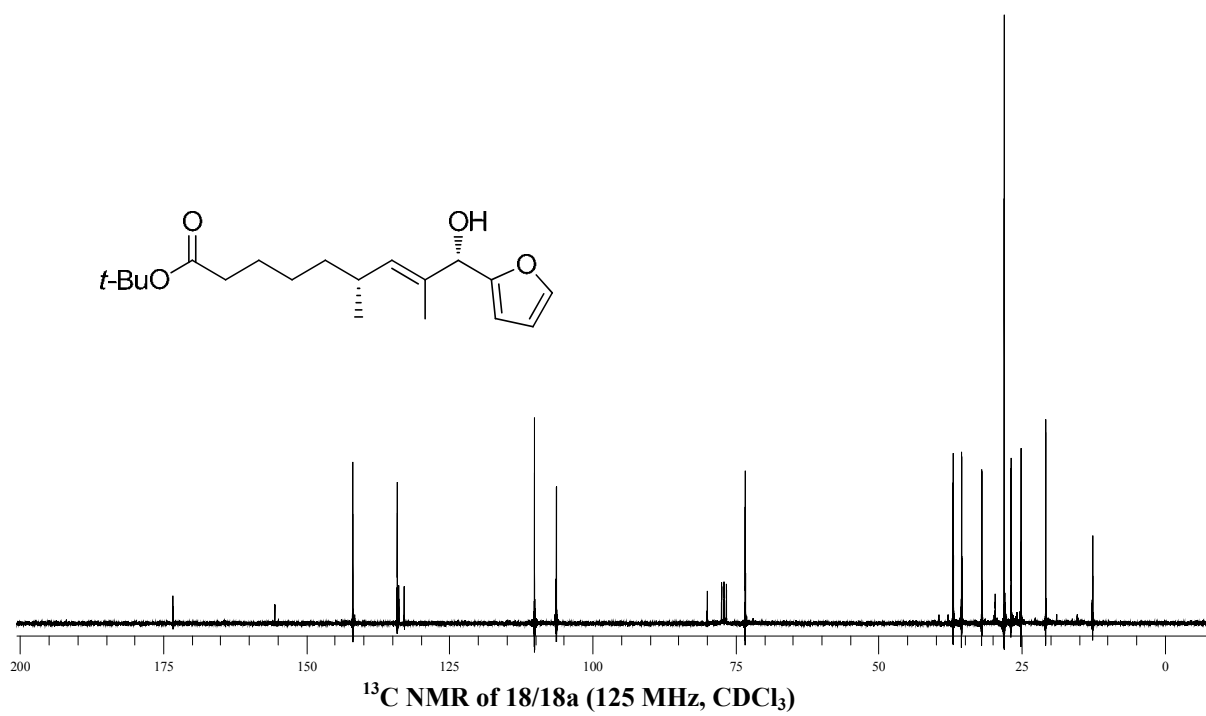



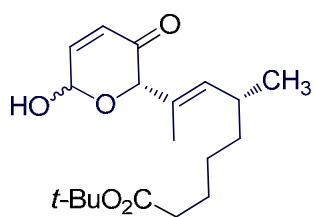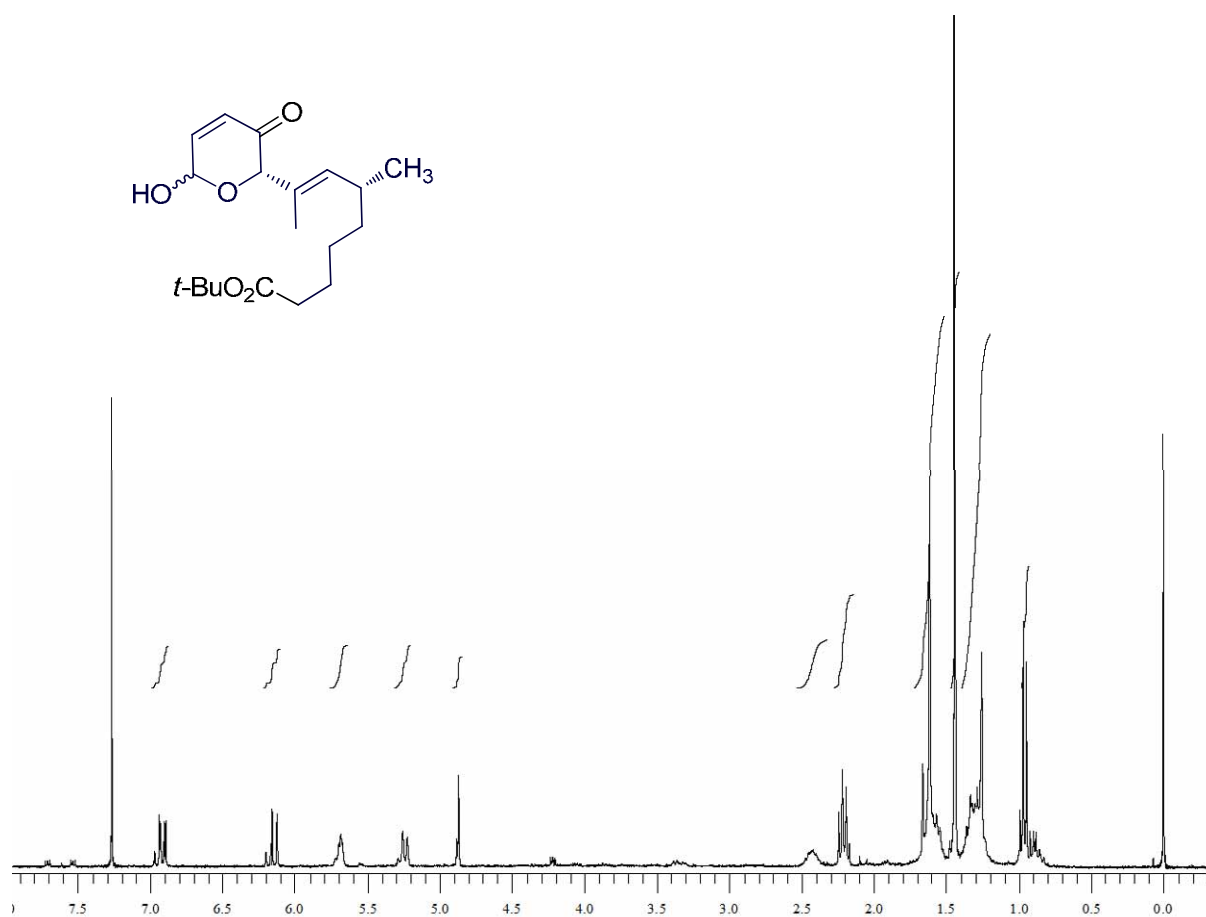

<sup>1</sup>H NMR of 19 (300 MHz, CDCl<sub>3</sub>)

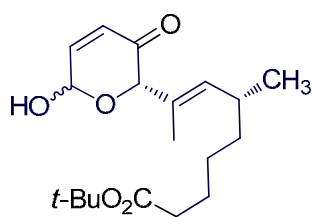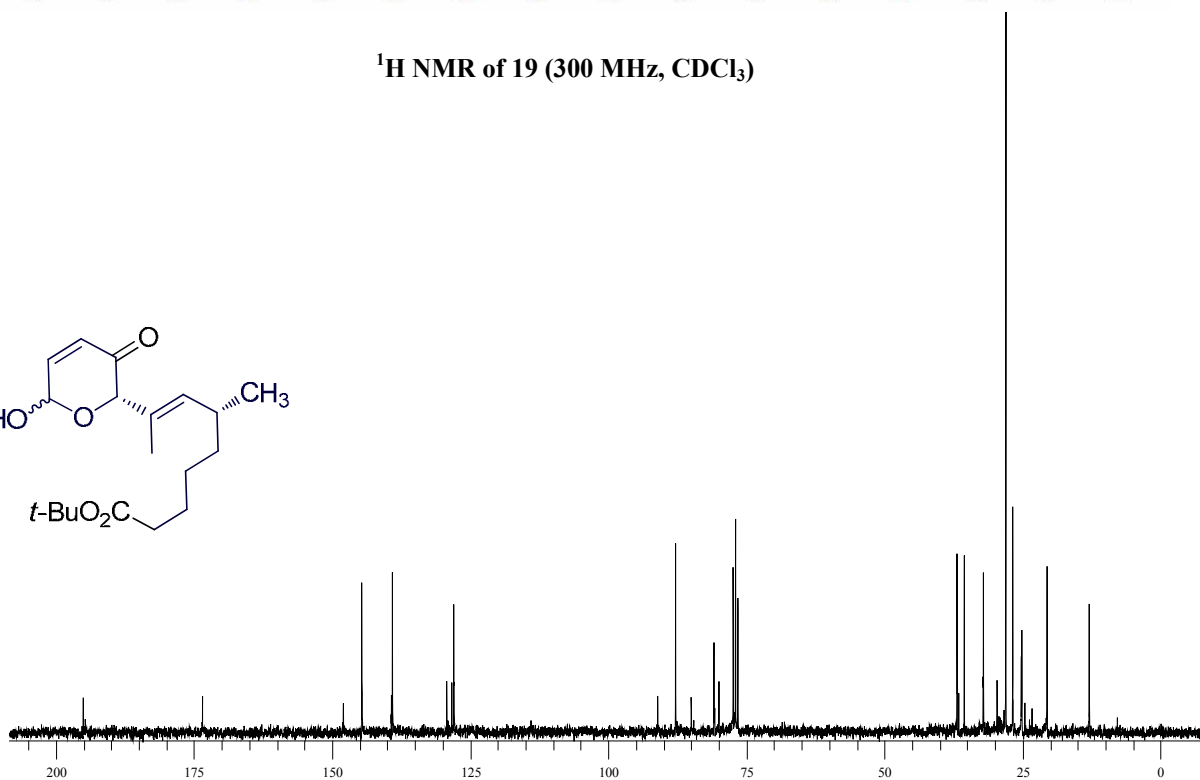

<sup>13</sup>C NMR of 19 (125 MHz, CDCl<sub>3</sub>)

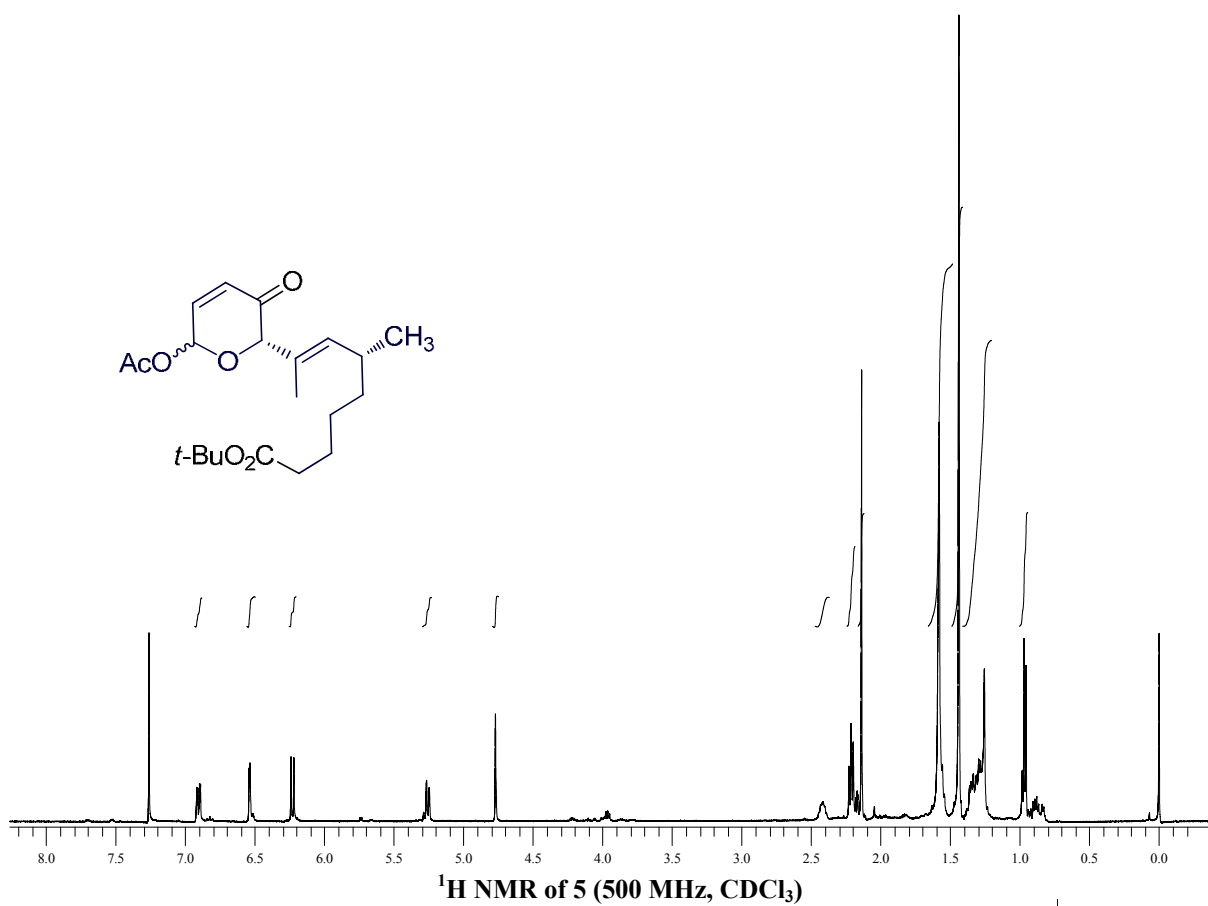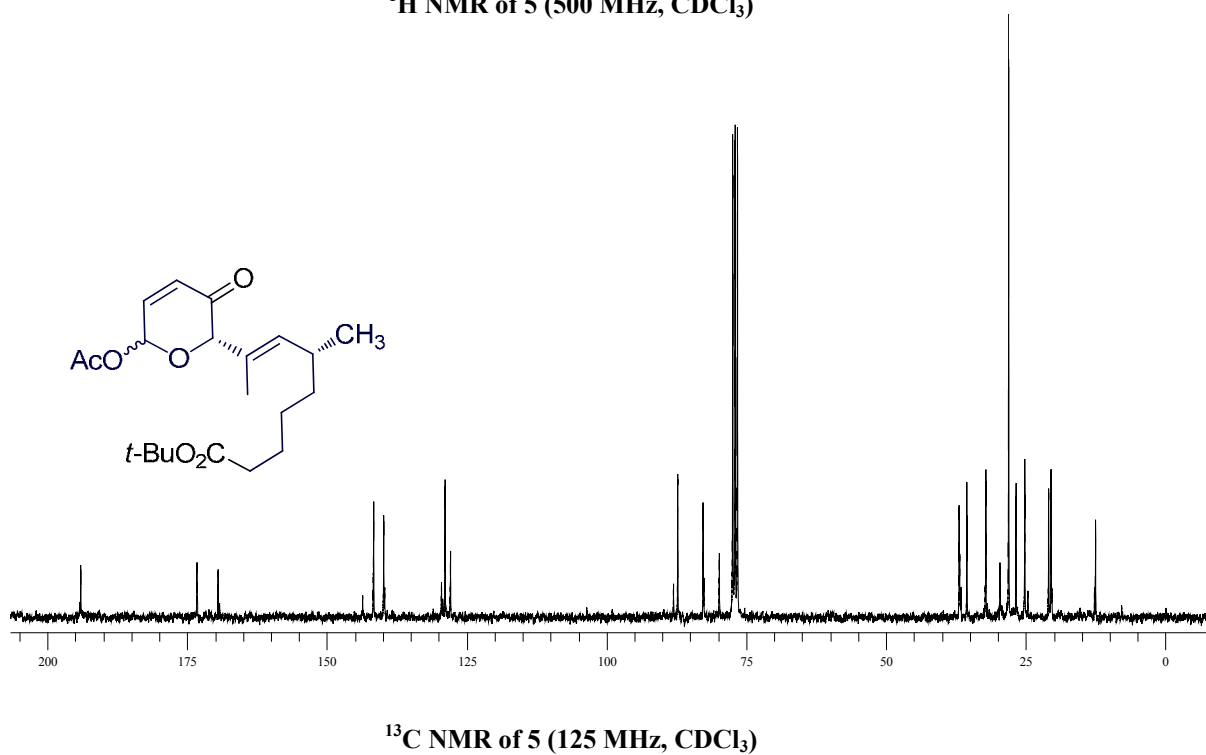

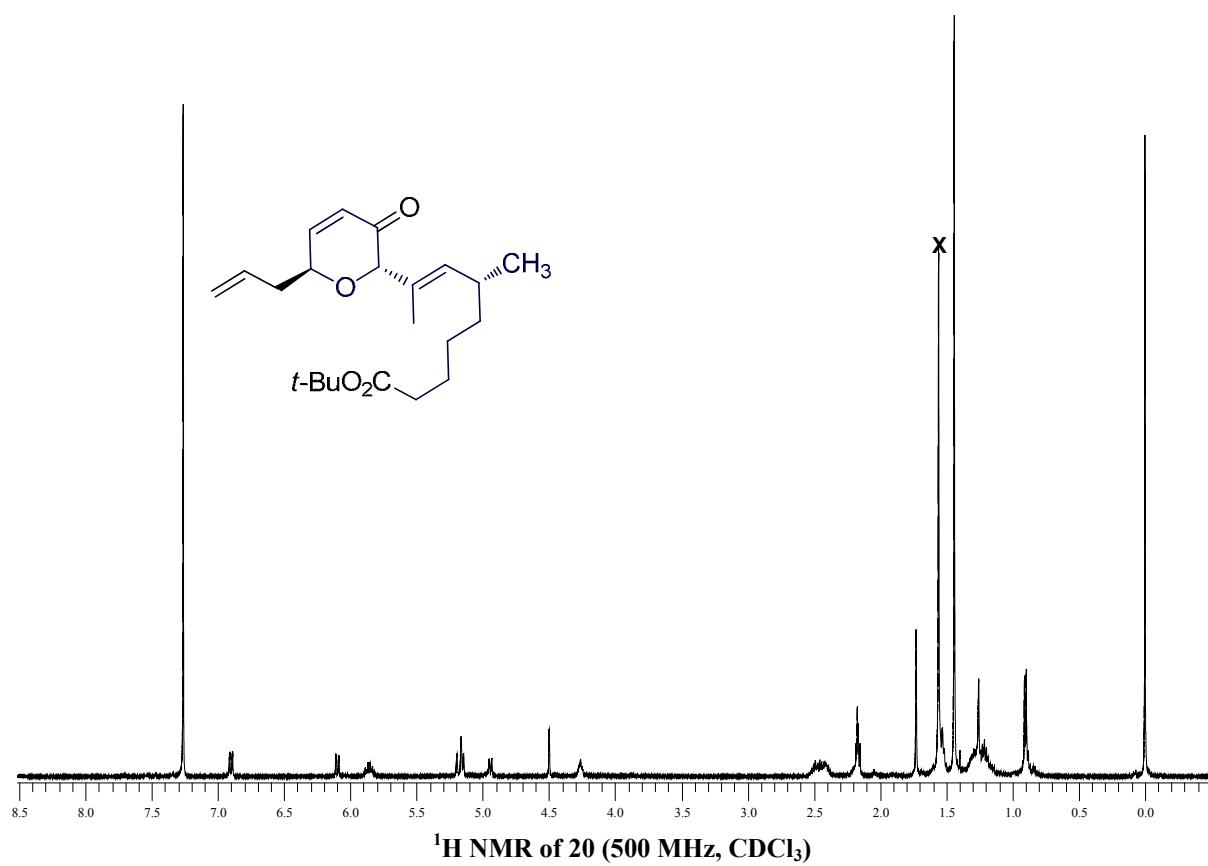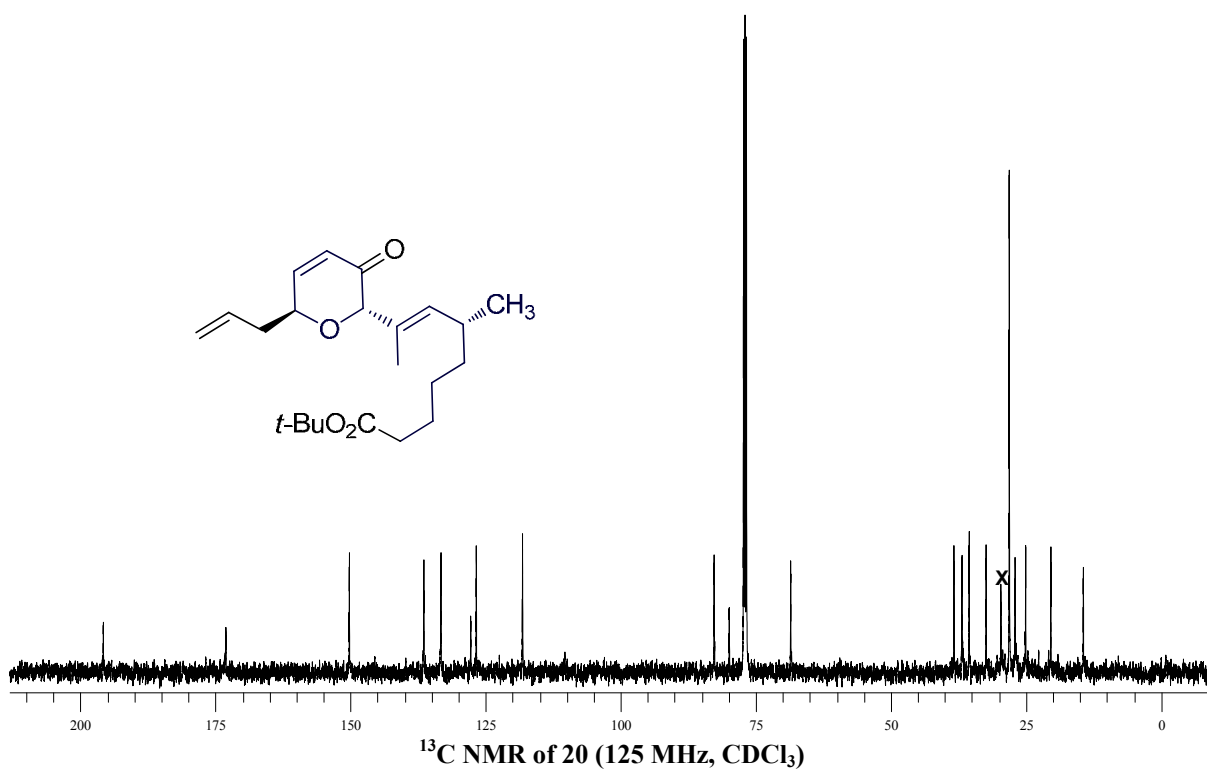

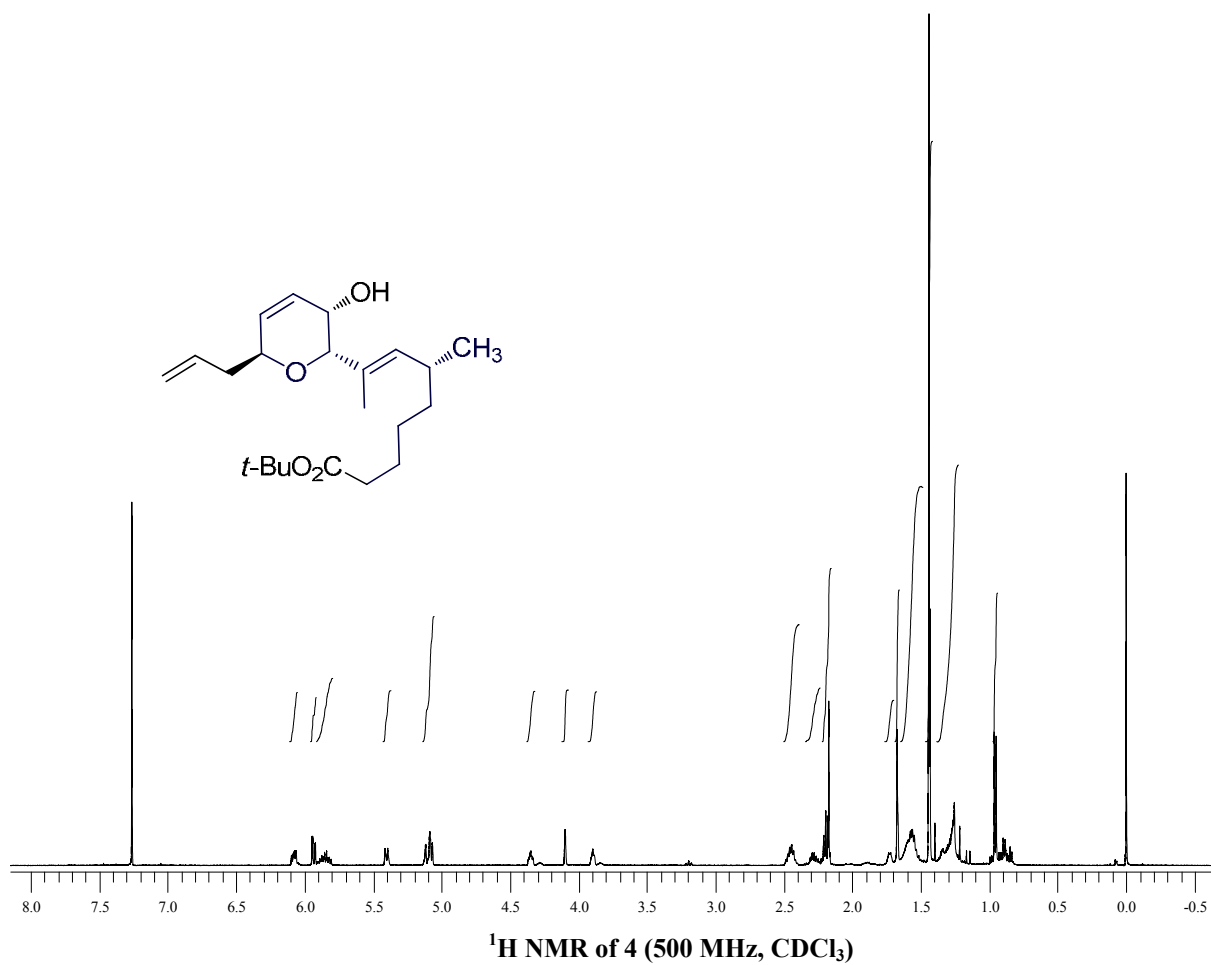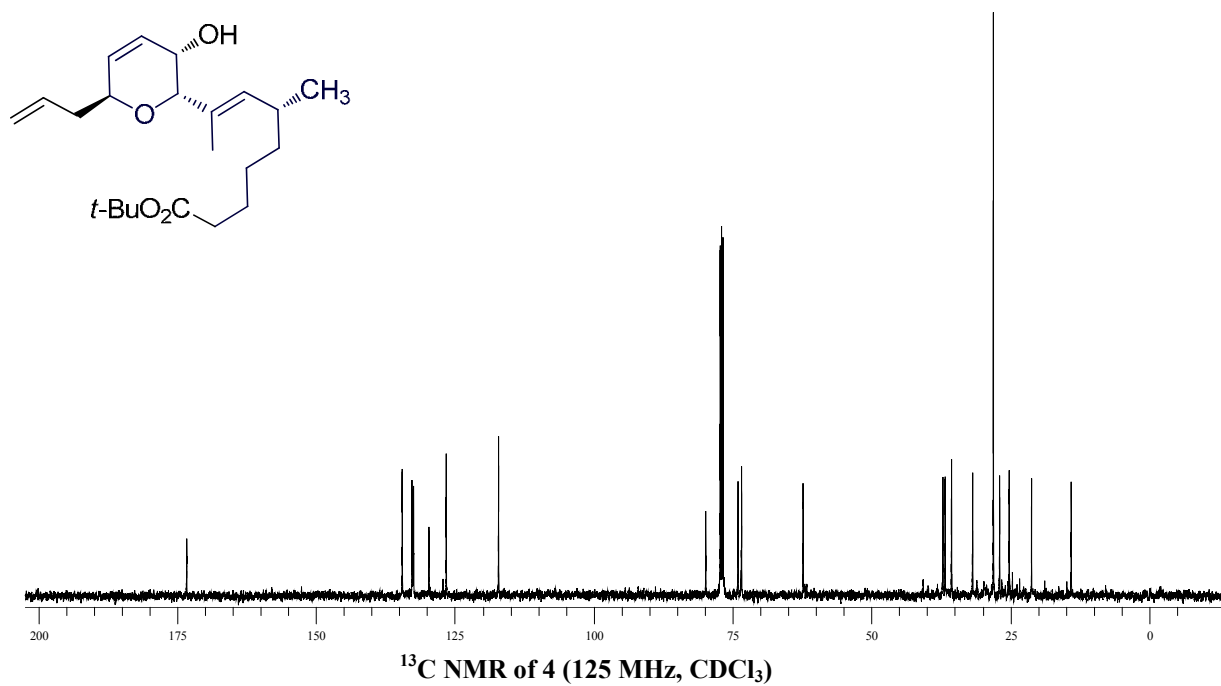

### nOe analysis of compound 20

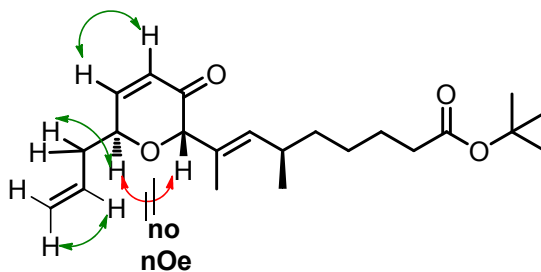

PSH-ALLYL  
SRIDAR

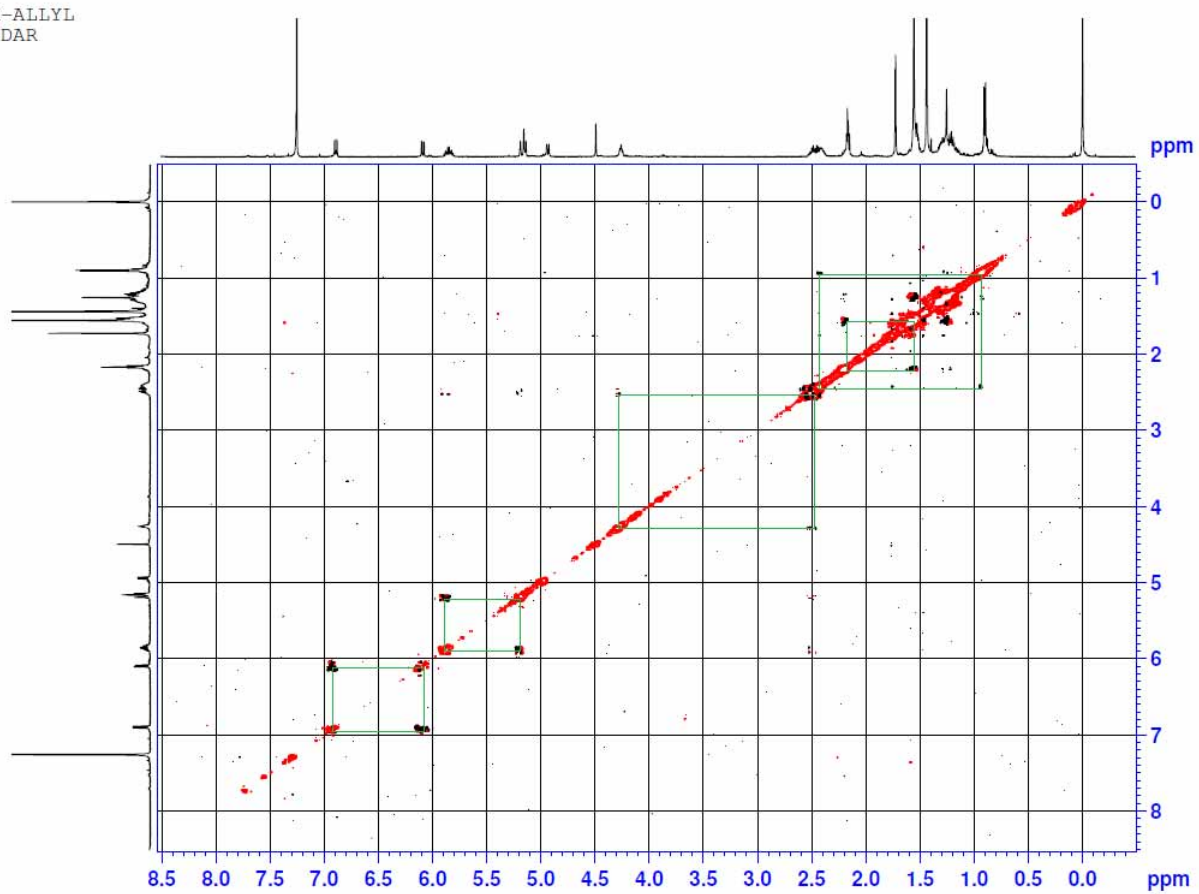

NOESY Spectrum of compound 20 in CDCl<sub>3</sub>

### Key nOe relations in compound 4

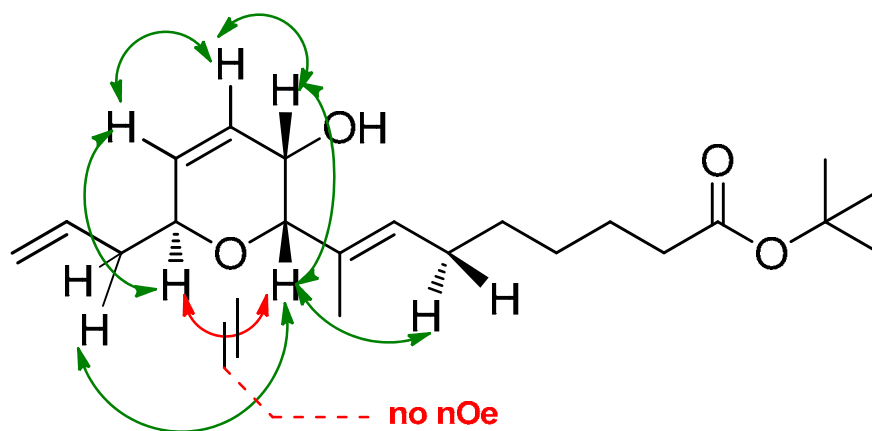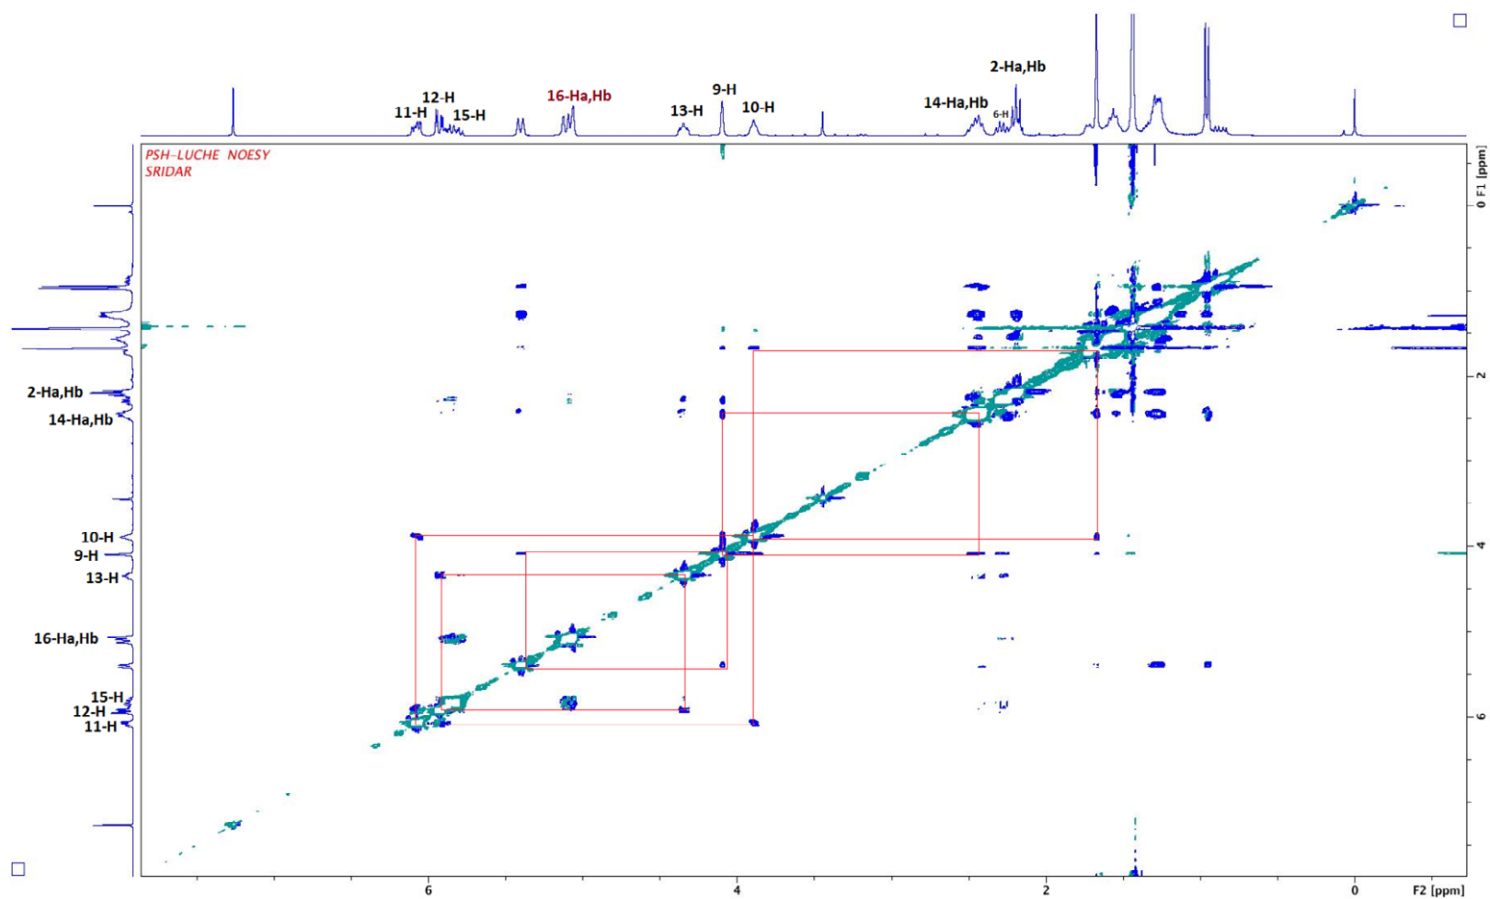

NOESY Spectrum of compound 4 in CDCl<sub>3</sub>

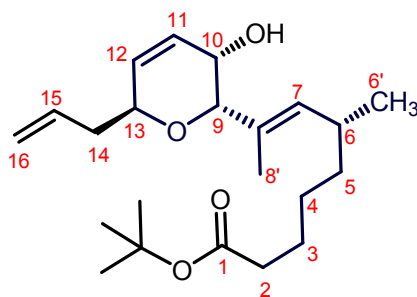

**Table 1. <sup>1</sup>H-NMR comparison of compound 4**

| Proton number      | Crimmins group data <sup>1</sup><br>(500 M Hz)   | Our data<br>(500 M Hz)                       |
|--------------------|--------------------------------------------------|----------------------------------------------|
| <i>t</i> -Butyl    | 1.43 (s, 9H)                                     | 1.44 (s, 9H)                                 |
| 2-H                | 2.19 (t, <i>J</i> = 7.5 Hz, 2H)                  | 2.19 (t, <i>J</i> = 7.3 Hz, 2H)              |
| 3-Ha, Hb           | 1.56 (m, 2H)                                     | 1.74-1.50 (m, 2H and 1O-H)                   |
| 4-Ha, Hb, 5-Ha, Hb | 1.34 (d, <i>J</i> = 3.67 Hz, 1H)<br>1.26 (m, 3H) | 1.38-1.18 (m, 4H)                            |
| 6-H                | 2.27 (dt, <i>J</i> = 14.0 Hz, 1H)                | 2.32-2.23 (m, 1H)                            |
| 6'-CH <sub>3</sub> | 0.95 (d, <i>J</i> = 6.6 Hz, 3H)                  | 0.96 (d, <i>J</i> = 6.7 Hz, 3H)              |
| 7-H                | 5.40 (d, <i>J</i> = 9.4 Hz, 1H)                  | 5.40 (d, <i>J</i> = 9.5 Hz, 1H)              |
| 8'-CH <sub>3</sub> | 1.67 (s, 3H)                                     | 1.67 (s, 3H)                                 |
| 9-H                | 4.09 (s, 1H)                                     | 4.10 (s, 1H)                                 |
| 10-H               | 3.89 (m, 1H)                                     | 3.92- 3.87 (m, 1H)                           |
| 11-H               | 6.08 (m, 1H)                                     | 6.08 (ddd, <i>J</i> = 10.1, 5.7, 1.9 Hz, 1H) |
| 12-H               | 5.93 (m, 1H)                                     | 5.93 (dd, <i>J</i> = 10.1, 3.1 Hz, 1H)       |
| 13-H               | 4.35 (m, 1H)                                     | 4.37-4.33 (m, 1H)                            |
| 14-Ha, Hb          | 2.45 (ddd, <i>J</i> = 13.6, 6.7, 6.5 Hz, 2H)     | 2.49-2.45 (m, 2H)                            |
| 15-H               | 5.84 (m, 1H)                                     | 5.91-5.80 (m, 1H)                            |
| 16-Ha, Hb          | 5.09 (m, 2H)                                     | 5.13-5.07 (m, 2H)                            |

**Table 2.**  $^{13}\text{C}$ -NMR comparison of compound 4

| Carbon number   |                   | Crimmins group data <sup>1</sup><br>(125 M Hz) | Our data<br>(125 M Hz) |
|-----------------|-------------------|------------------------------------------------|------------------------|
| <i>t</i> -Butyl | 3-CH <sub>3</sub> | 28.1                                           | 28.1                   |
|                 | 4 <sup>o</sup> -C | 79.9                                           | 79.9                   |
| 1-C             |                   | 173.3                                          | 173.3                  |
| 2-C             |                   | 35.6                                           | 35.6                   |
| 3-C             |                   | 25.2                                           | 25.2                   |
| 4-C             |                   | 14.1                                           | 14.1                   |
| 5-C             |                   | 36.8                                           | 36.8                   |
| 6-C             |                   | 31.8                                           | 31.8                   |
| 6'-C            |                   | 21.3                                           | 21.2                   |
| 7-C             |                   | 132.5                                          | 132.5                  |
| 8-C             |                   | 134.5                                          | 134.5                  |
| 8'-C            |                   | 27.0                                           | 27.0                   |
| 9-C             |                   | 73.4                                           | 73.4                   |
| 10-C            |                   | 62.3                                           | 62.3                   |
| 11-C            |                   | 132.5                                          | 132.5                  |
| 12-C            |                   | 126.5                                          | 126.6                  |
| 13-C            |                   | 74.0                                           | 74.0                   |
| 14-C            |                   | 37.2                                           | 37.2                   |
| 15-C            |                   | 132.8                                          | 132.7                  |
| 15-C            |                   | 117.2                                          | 117.2                  |

1. M. T. Crimmins, M. W. Haley, E. A. O'Bryan, *Org. Lett.*, 2011, **13**, 4712
